# Supplementary material for: Development of homogeneous liquid–liquid extraction combined with dispersive liquid–liquid microextraction based on solidification of floating droplets of a ternary component deep eutectic solvent for the analysis of antibiotic residues in sausage samples prior to ion mobility spectrometry
Source: Royal Society of Chemistry journal article supplement (doi:10.1039/d0ay01282c), 2020-01-01
Supplement: d0ay01282c1.pdf [file d0ay01282c1.pdf]

### Supplementary data

**Development of homogenous liquid–liquid extraction combined with ternary component deep eutectic solvent based solidification of floating droplets dispersive liquid–liquid microextraction for the analysis of antibiotic residues in sausage samples prior to ion mobility spectrometry**

Ali Saei<sup>a</sup>, Afshin Javadi<sup>a,\*</sup>, Mohammad Reza Afshar Mogaddam<sup>b</sup>, Hamid Mirzaei<sup>a</sup>, Mahboob Nemati<sup>c</sup>

<sup>a</sup> *Department of Food hygiene, Tabriz Branch, Islamic Azad University, Tabriz, Iran.*

<sup>b</sup> *Food and Drug Safety Research Center, Tabriz University of Medical Science, Tabriz, Iran*

<sup>c</sup> *Pharmaceutical Analysis Research Center, Tabriz University of Medical Science, Tabriz, Iran*

\*Corresponding author: Dr. Afshin Javadi

Tel.: 98 9141165059

Fax: 98 4136376934

E-mail address: javadi@iaut.ac.ir; afshinjavadi@yahoo.com

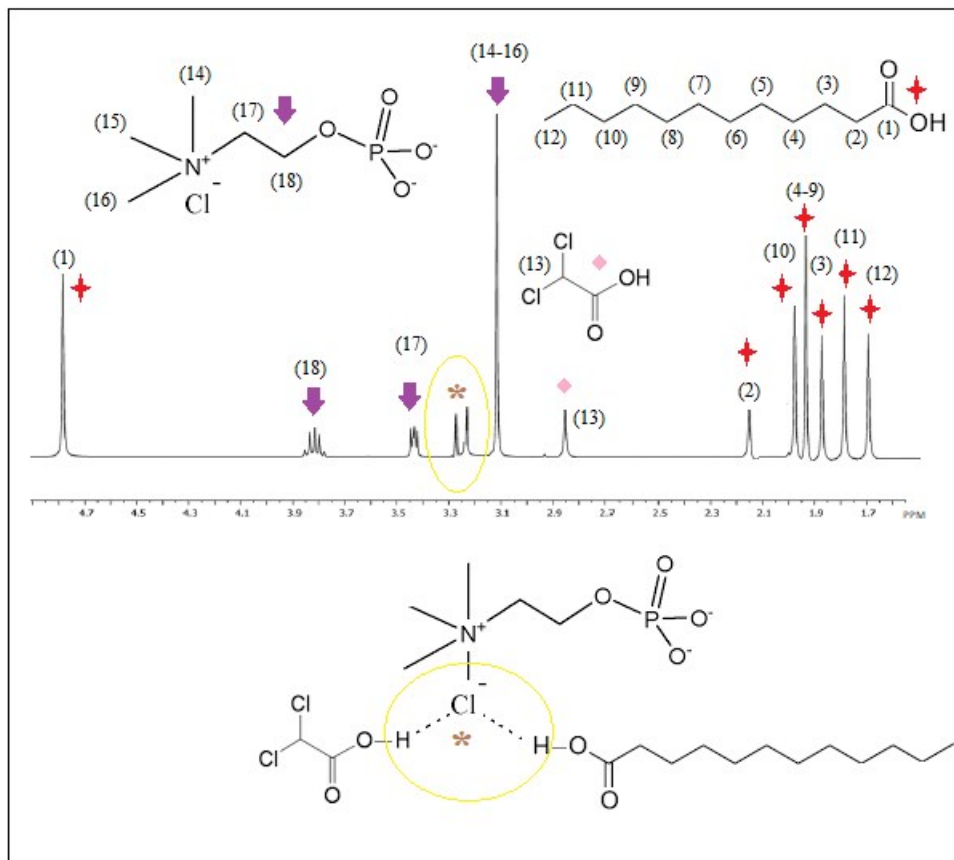

Fig. S1. HNMR spectra of the prepared DES.

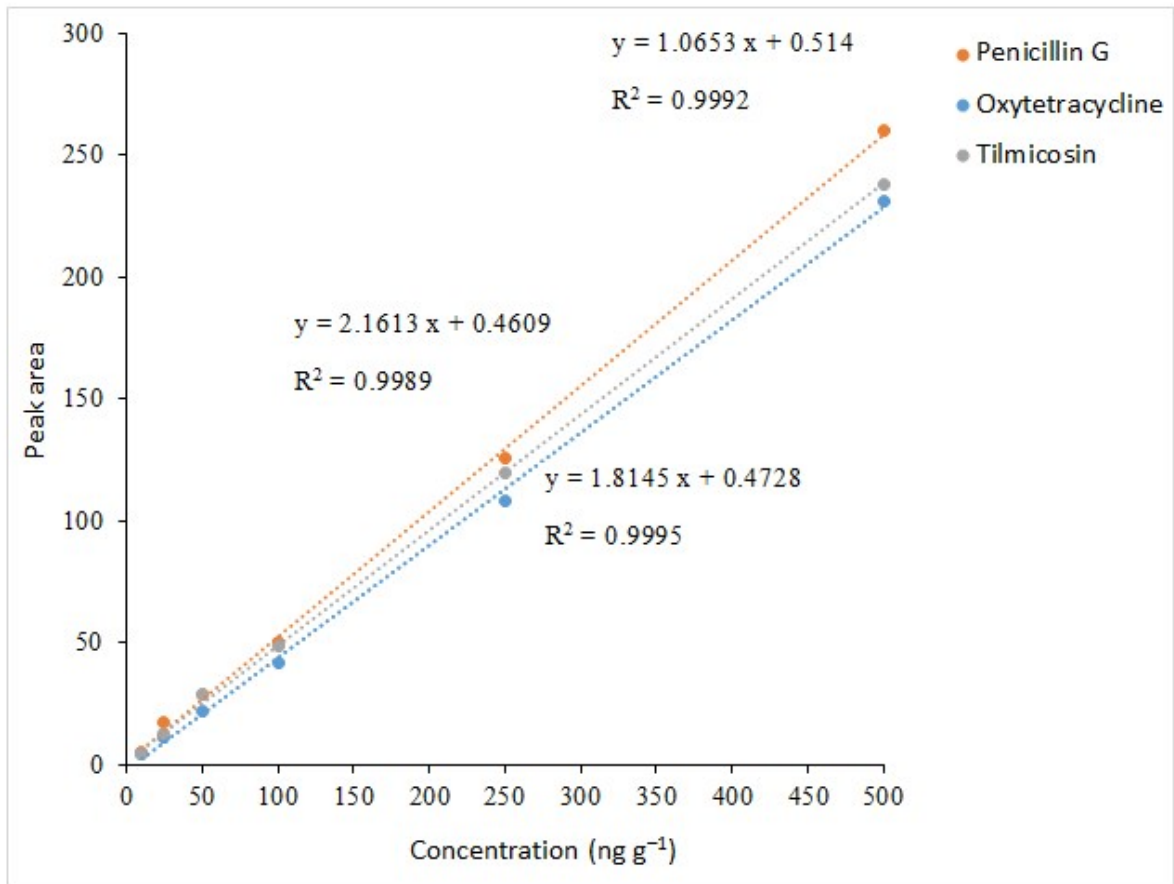

Fig. S2. Calibration curves for the studied analytes.
